# Supplementary material
Source: publisher figshare collection journal article supplement (https://frontiersin.figshare.com/ndownloader/files/25442561)
Supplement: Supplementary file 1 [file 25442561]

## Supplementary Material

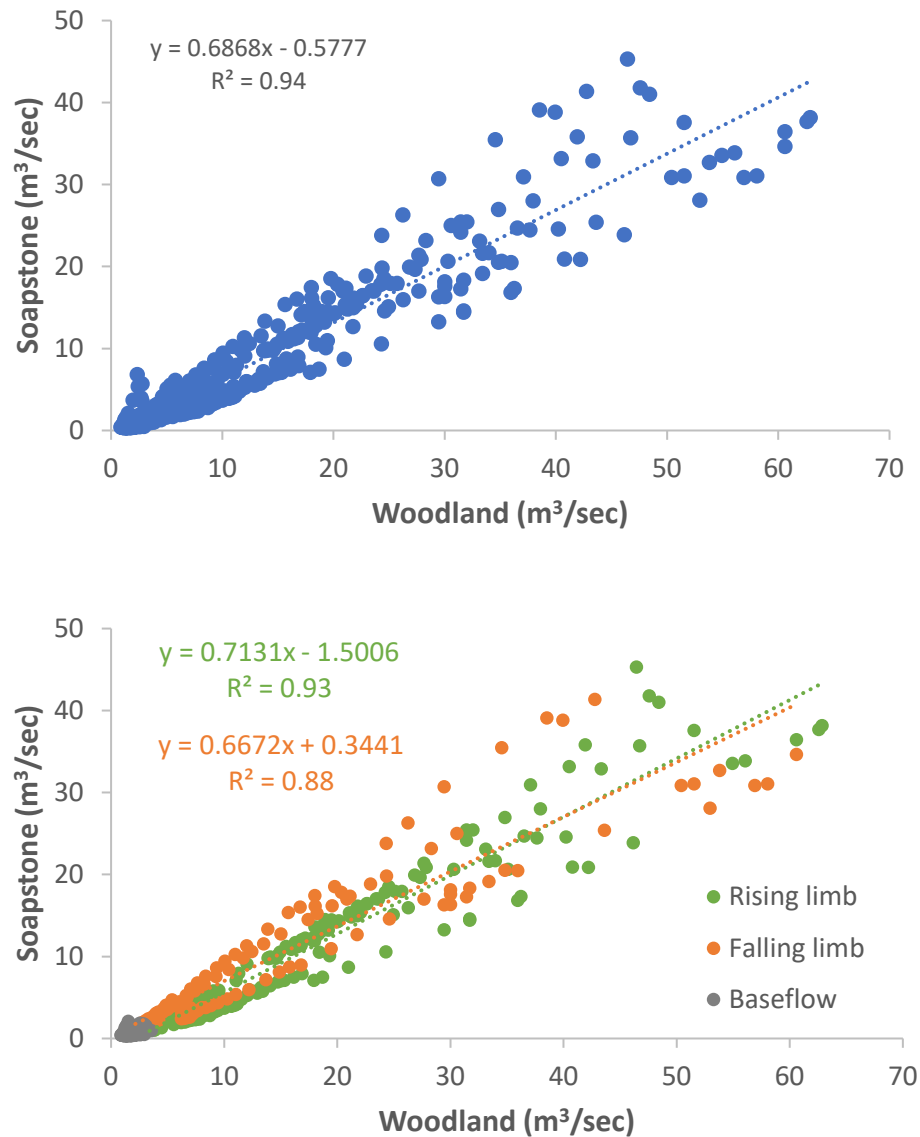

**Supplementary Figure 1.** Relationship between discharge at Soapstone and Woodland over three years of overlapping data (2015-2017). The top panel shows the regression equation using all data. The bottom panel shows individual regression equations for selected data during baseflow and the rising or falling limbs of the hydrograph.

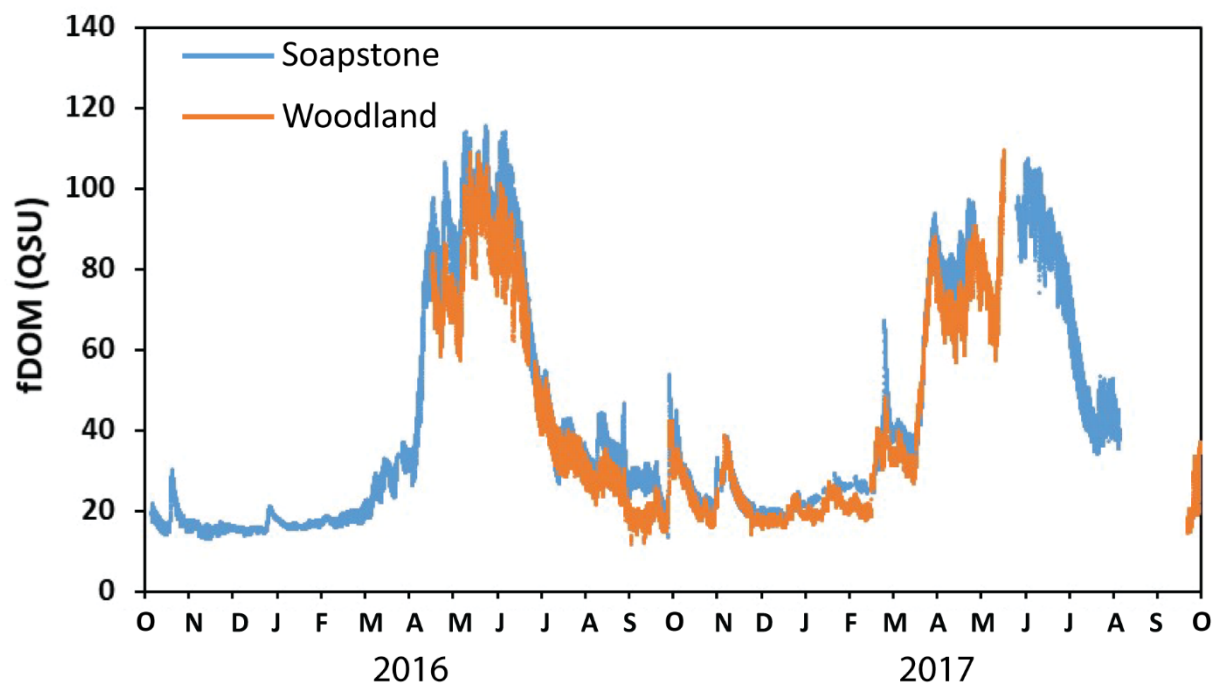

**Supplementary Figure 2.** Fluorescent dissolved organic matter (fDOM) concentrations at Soapstone and Woodland during 2016 and 2017. Units are quinine sulfate units (QSU). Data obtained from:

iUTAH GAMUT Working Group (2019). iUTAH GAMUT Network Quality Control Level 1 Data at Provo River near Soapstone Basic Aquatic (PR\_ST\_BA), HydroShare, <http://www.hydroshare.org/resource/e640b21cb9b04d20a952cf156459a729>

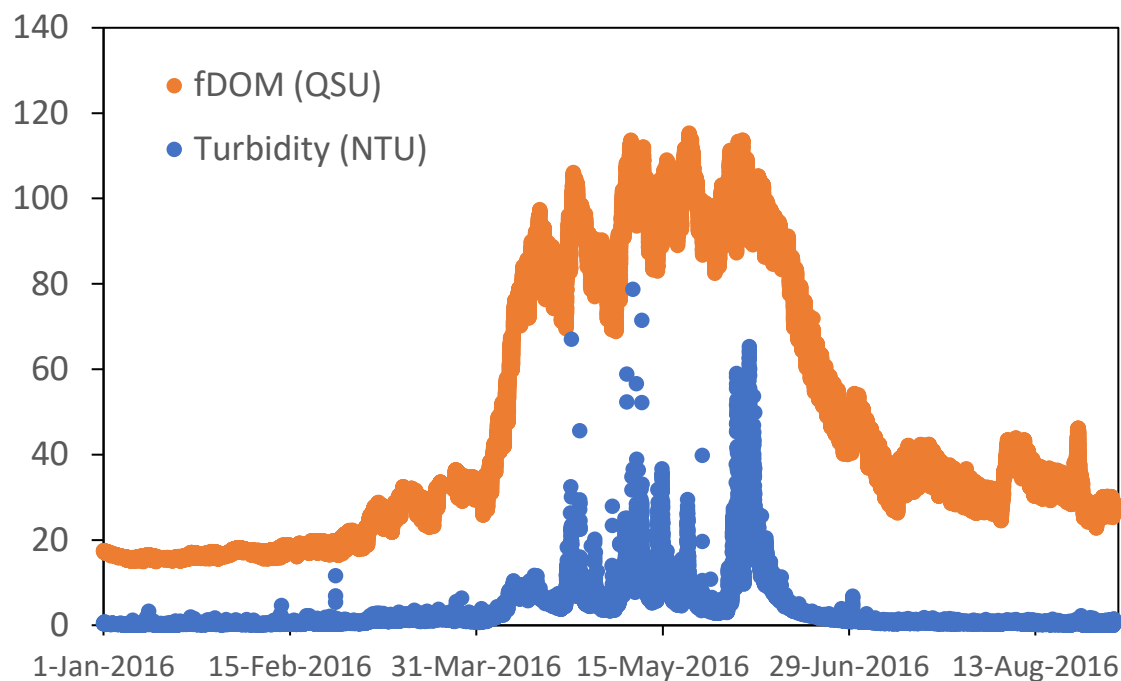

**Supplementary Figure 3.** Fluorescent dissolved organic matter (fDOM) and turbidity concentrations at Soapstone during 2016. Units are quinine sulfate units (QSU) and nephelometric turbidity units (NTU). Data obtained from:

iUTAH GAMUT Working Group (2019). iUTAH GAMUT Network Quality Control Level 1 Data at Provo River near Soapstone Basic Aquatic (PR\_ST\_BA), HydroShare, <http://www.hydroshare.org/resource/e640b21cb9b04d20a952cf156459a729>
